# Supplementary material for: An automatic lake-model application using near real-time data forcing: Development of an operational forecast model for Lake Erie
Source: Copernicus journal article supplement (doi:10.5194/gmd-2021-34), 2021-03-29
Supplement: Supplementary file [file gmd-2021-34-AC1-supplement.pdf]

Dear Dr. Kerkweg,

Thank you for your suggestions and for notifying us about our mistake in the Code Availability Section.

As you suggested, we have added “COASTLINES” into the title of our article, and we have made the framework of COASTLINES open-source, by uploading all the executive code for running COASTLINES to the Dataverse (see Code and data availability). The code for running COASTLINES is now accessible at a doi (<https://doi.org/10.5683/SP2/VTN7WC>).

In the revision, we have adopted the suggestions from you and reviewers, stressing the novelty of the study, supplying the details in the COASTLINES workflow, and making the discussion about forecast result more consistent.

Thank you very much for your consideration.

Regards,

Shuqi Lin and co-authors
